# Supplementary material for: Ethnomedicinal Studies, Chemical Composition, and Antibacterial Activity of the Mammea americana L. Bark in the Municipality of Cértegui, Chocó, Colombia
Source: Hindawi journal article supplement (doi:10.1155/2022/9950625), 2022-01-19
Supplement: f1 [file 9950625.f1.zip]

# δ-Elemene

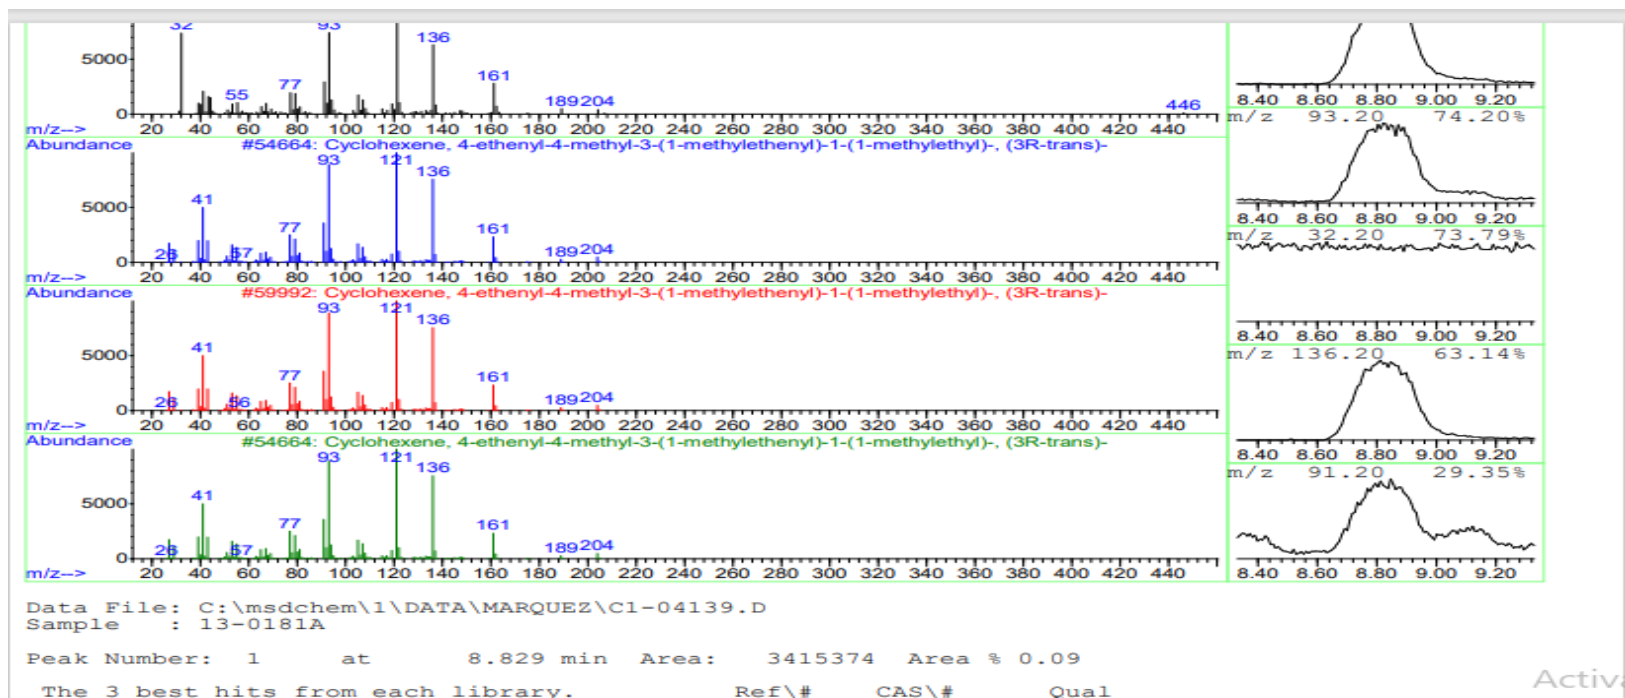

$\alpha$ -Cubebene

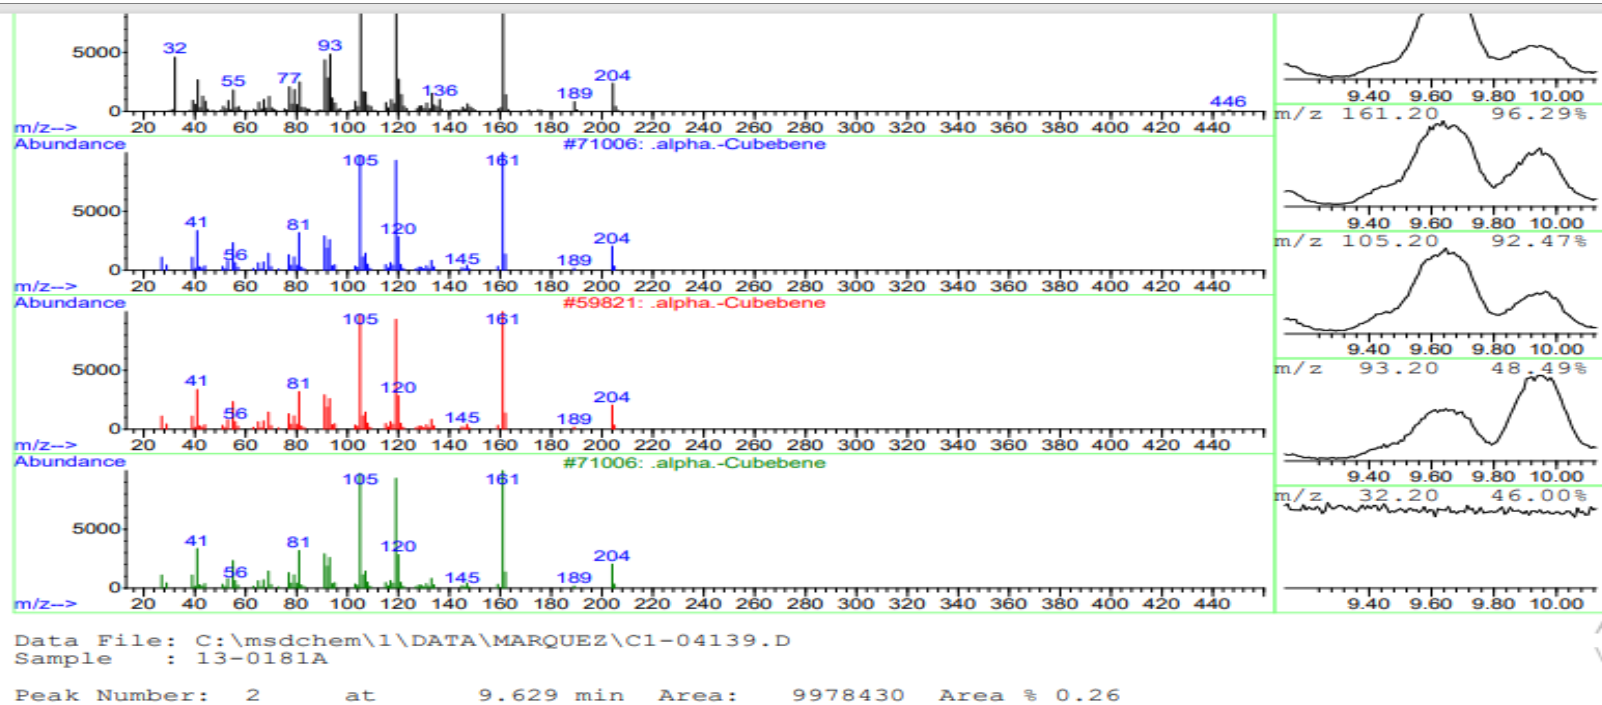

# Germacrene A

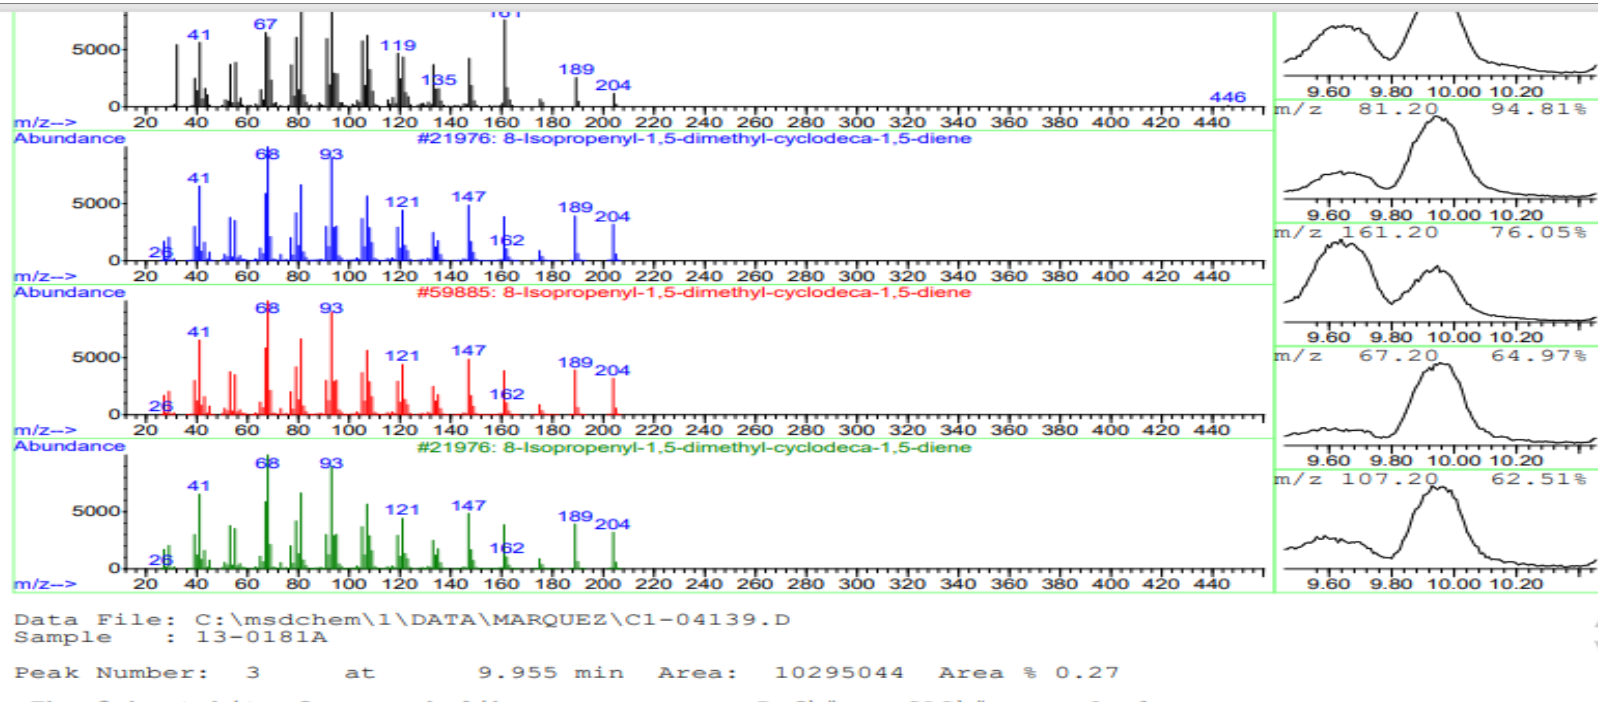

# Caryophyllene

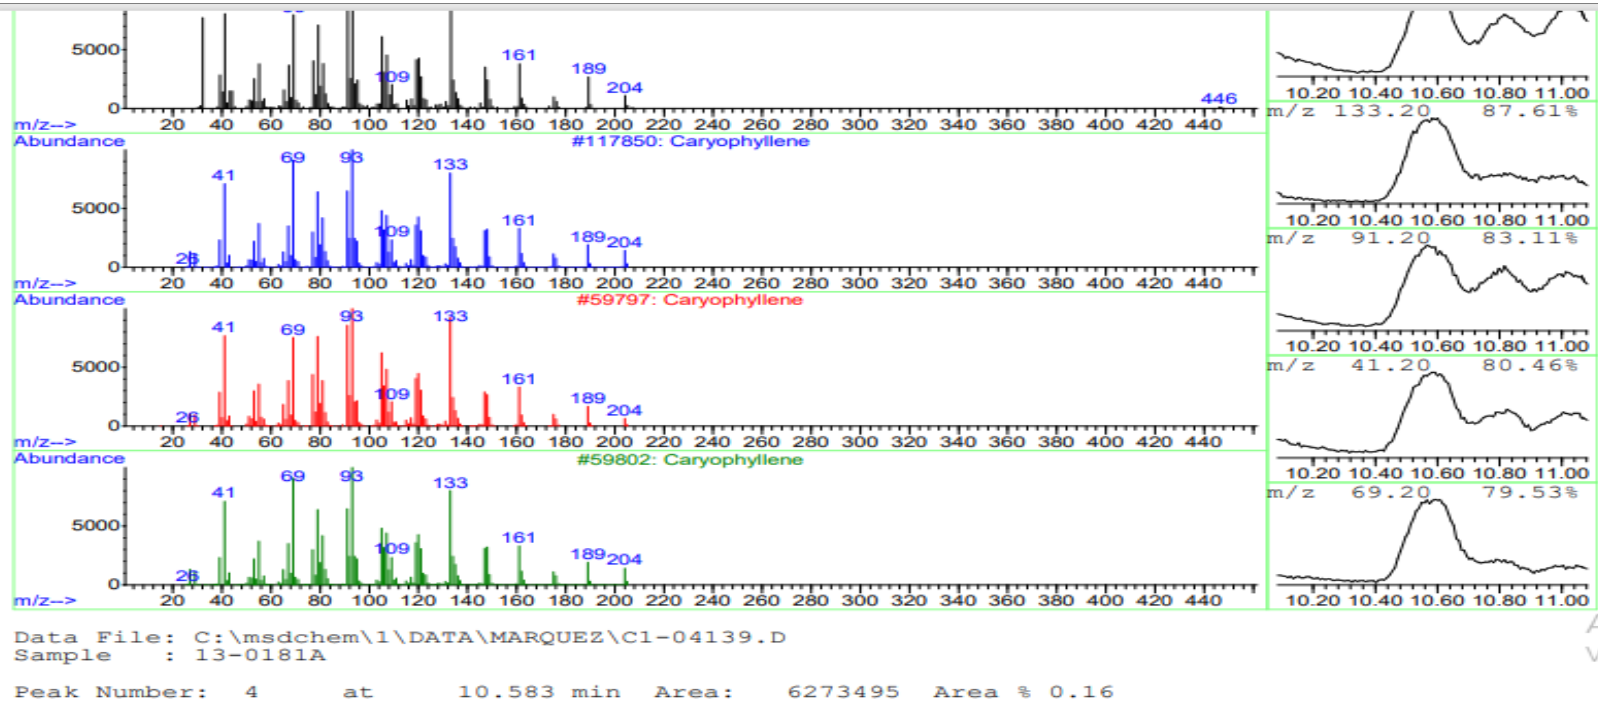

# Calarene

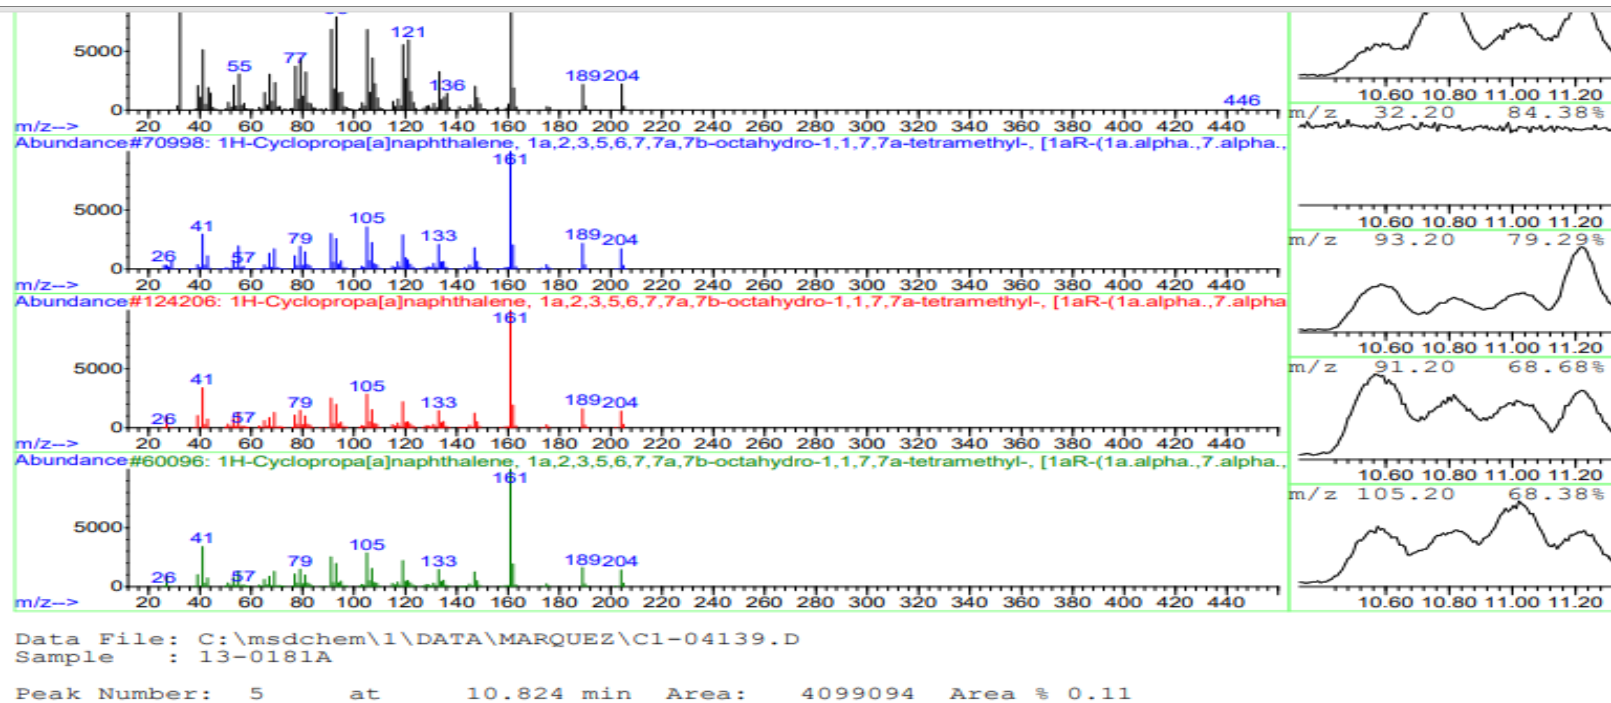

# Caryophylladienol II

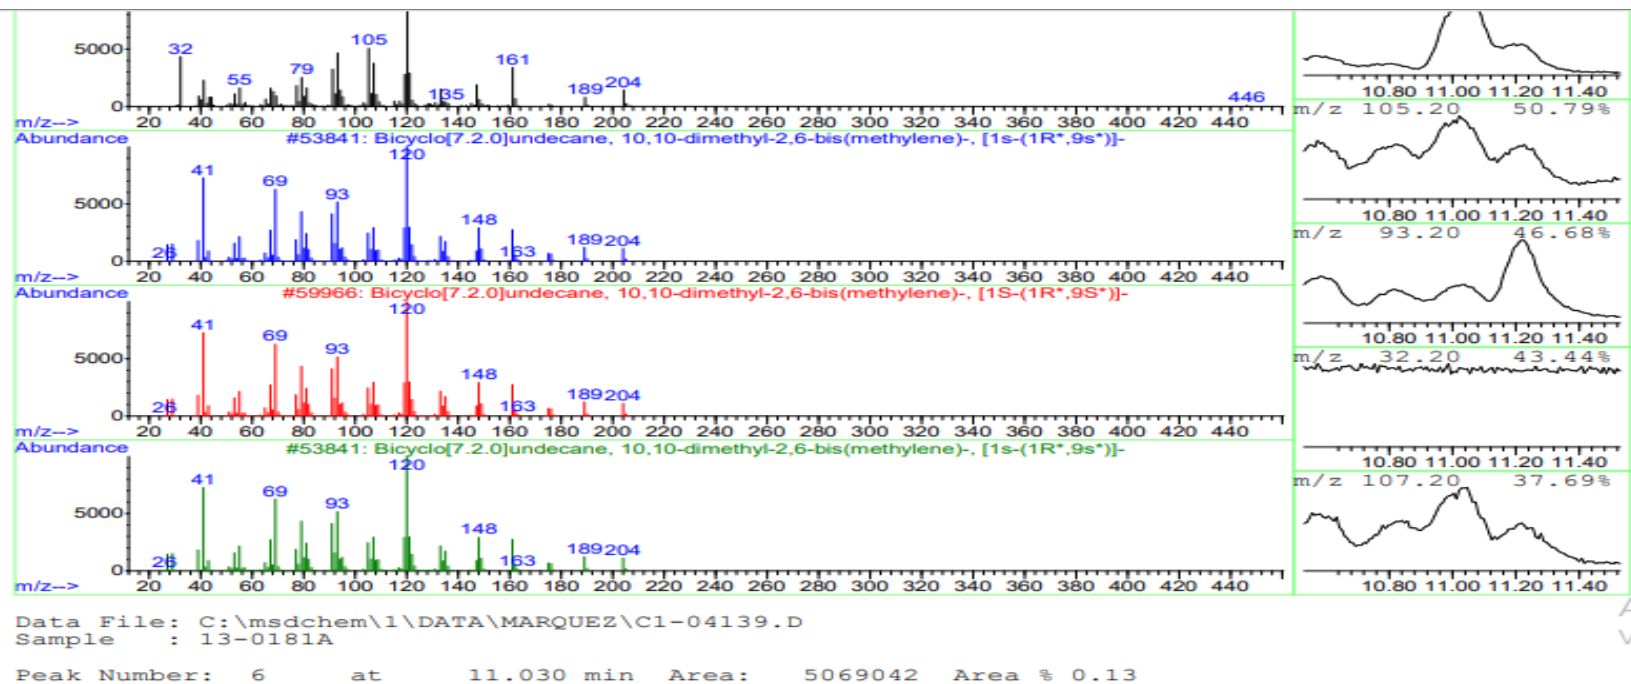

(E)- $\beta$ -Farnesene

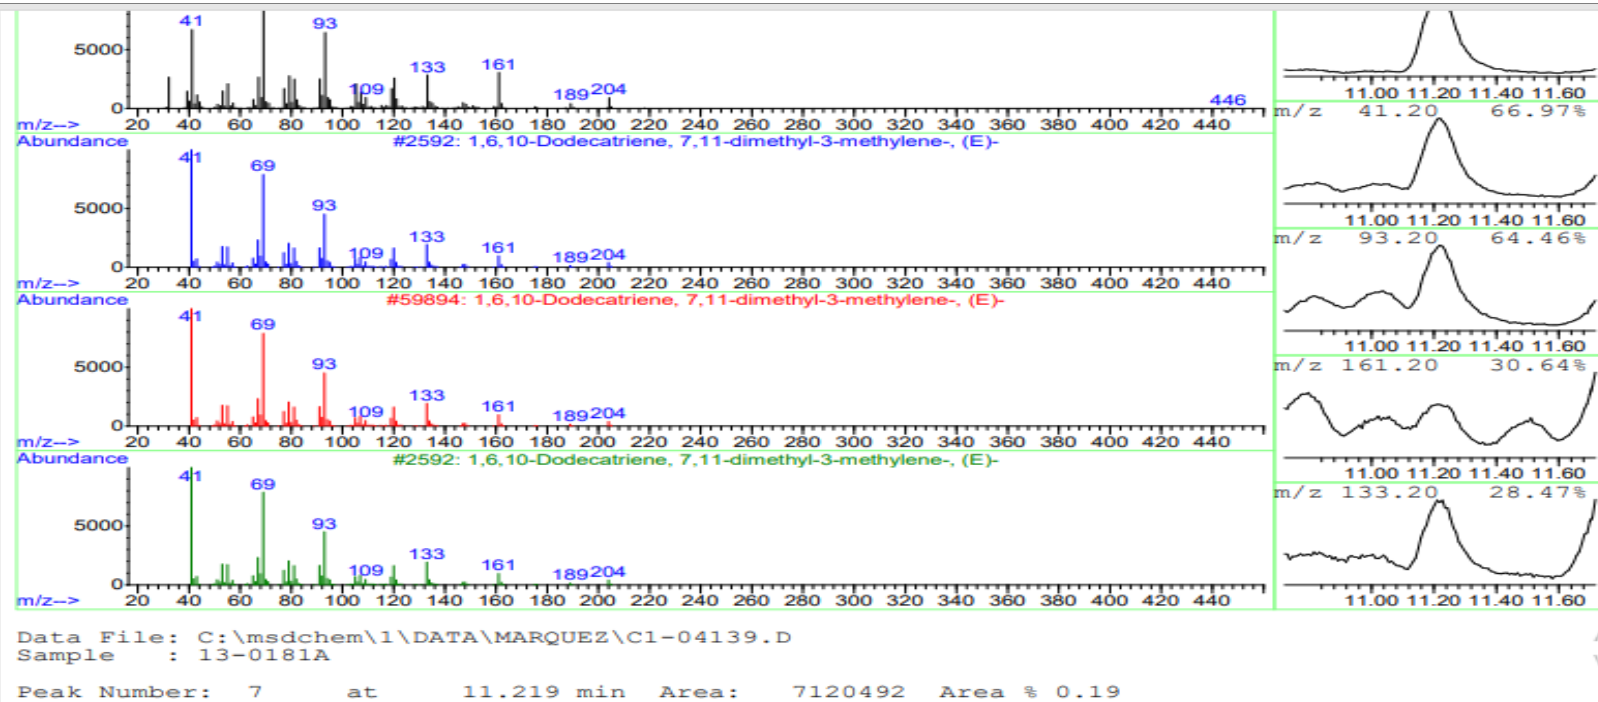

# Epizonarene

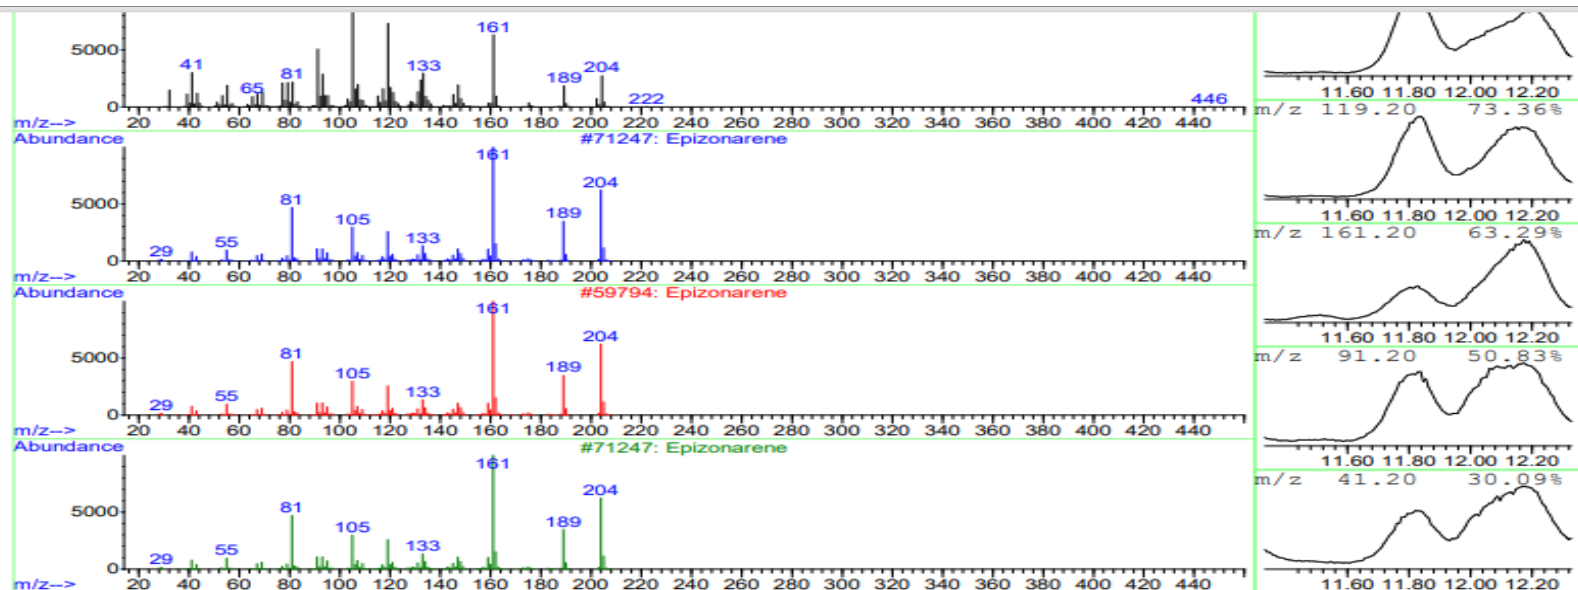

Data File: C:\msdchem\1\DATA\MARQUEZ\C1-04139.D  
Sample : 13-0181A

Peak Number: 8 at 11.829 min Area: 18970077 Area % 0.50

A  
Vc



$\alpha$ -Elemene

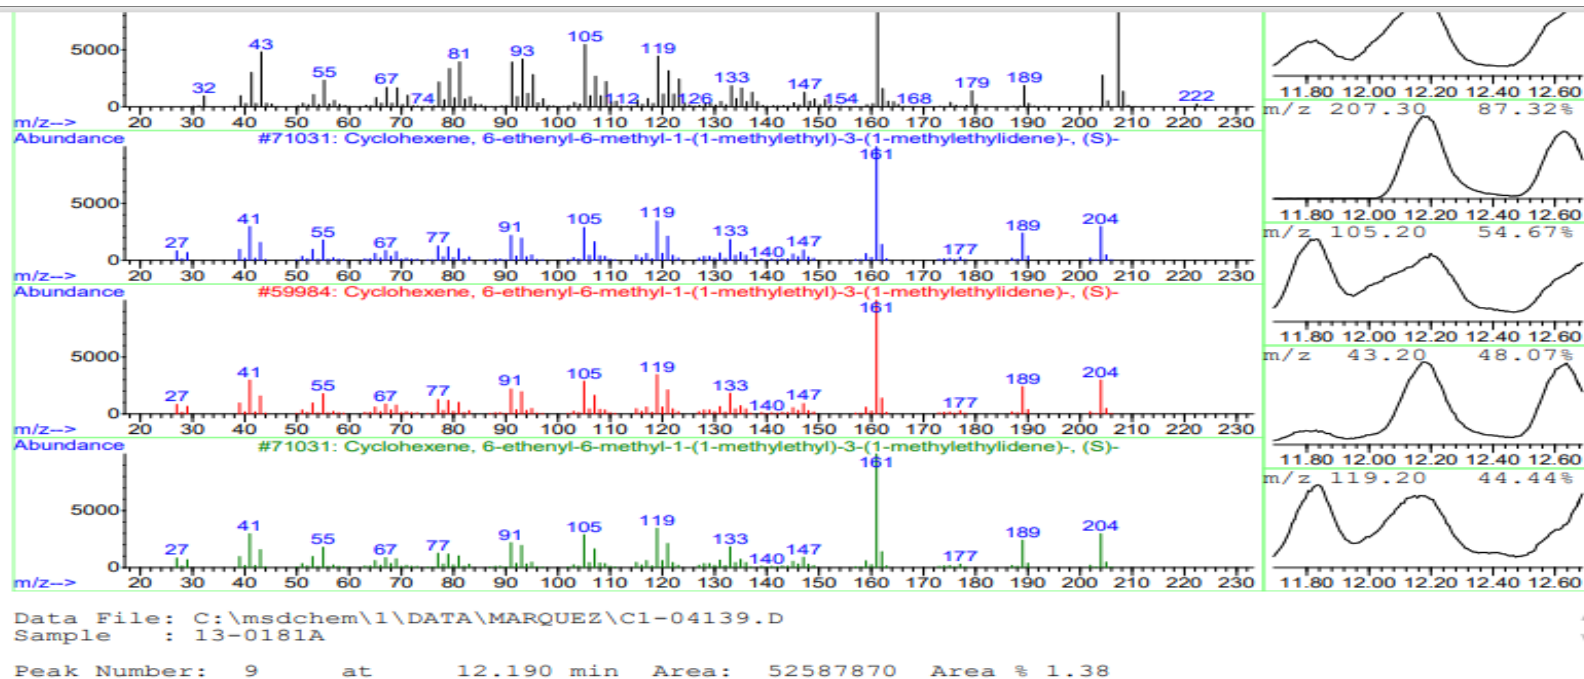

$\delta$ -Cadinene

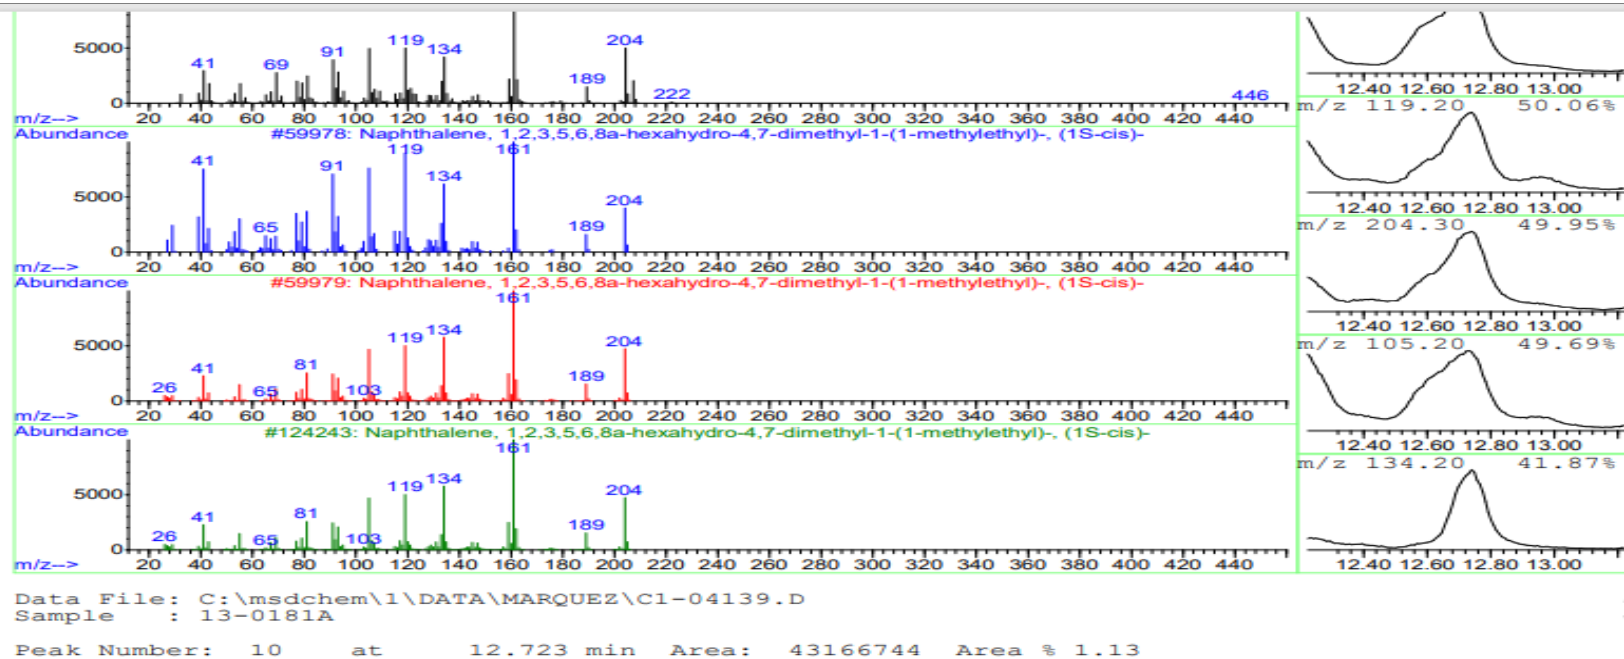

$\gamma$ -Gurjunene

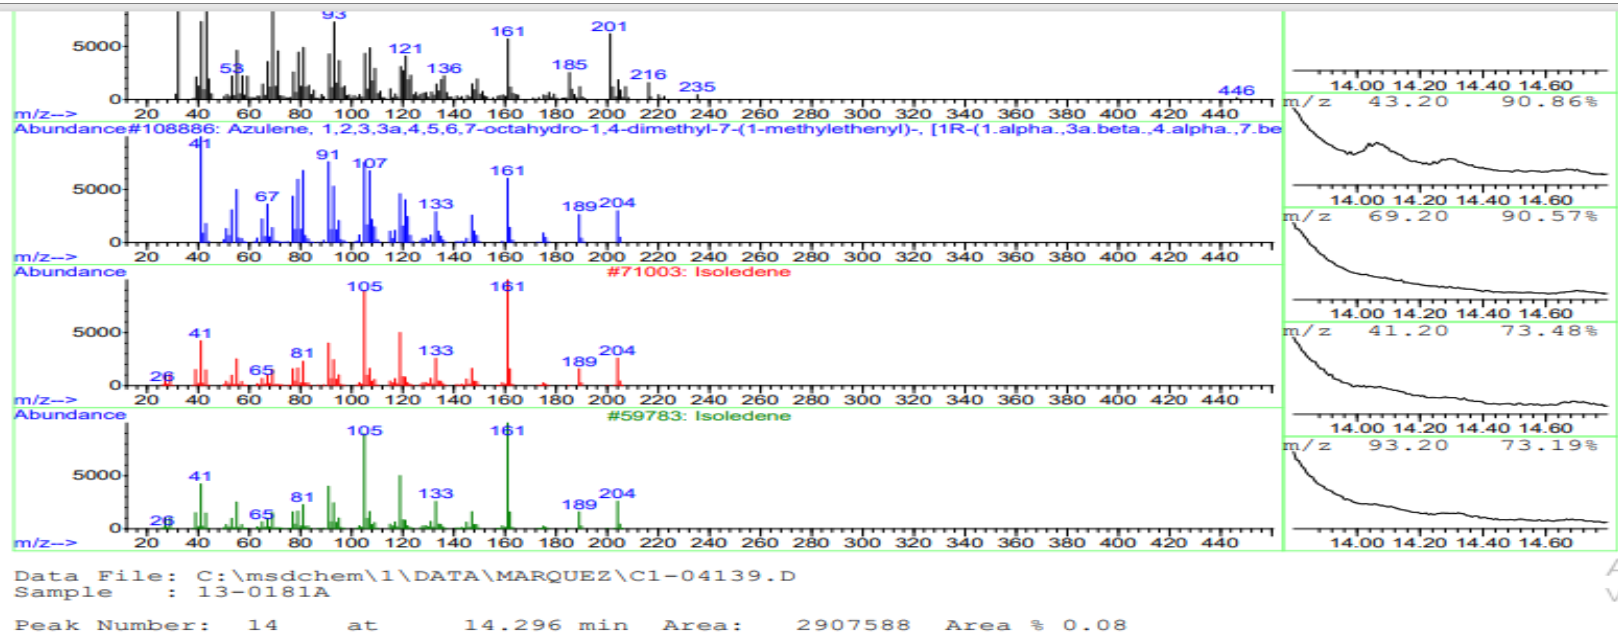

# Nerolidol

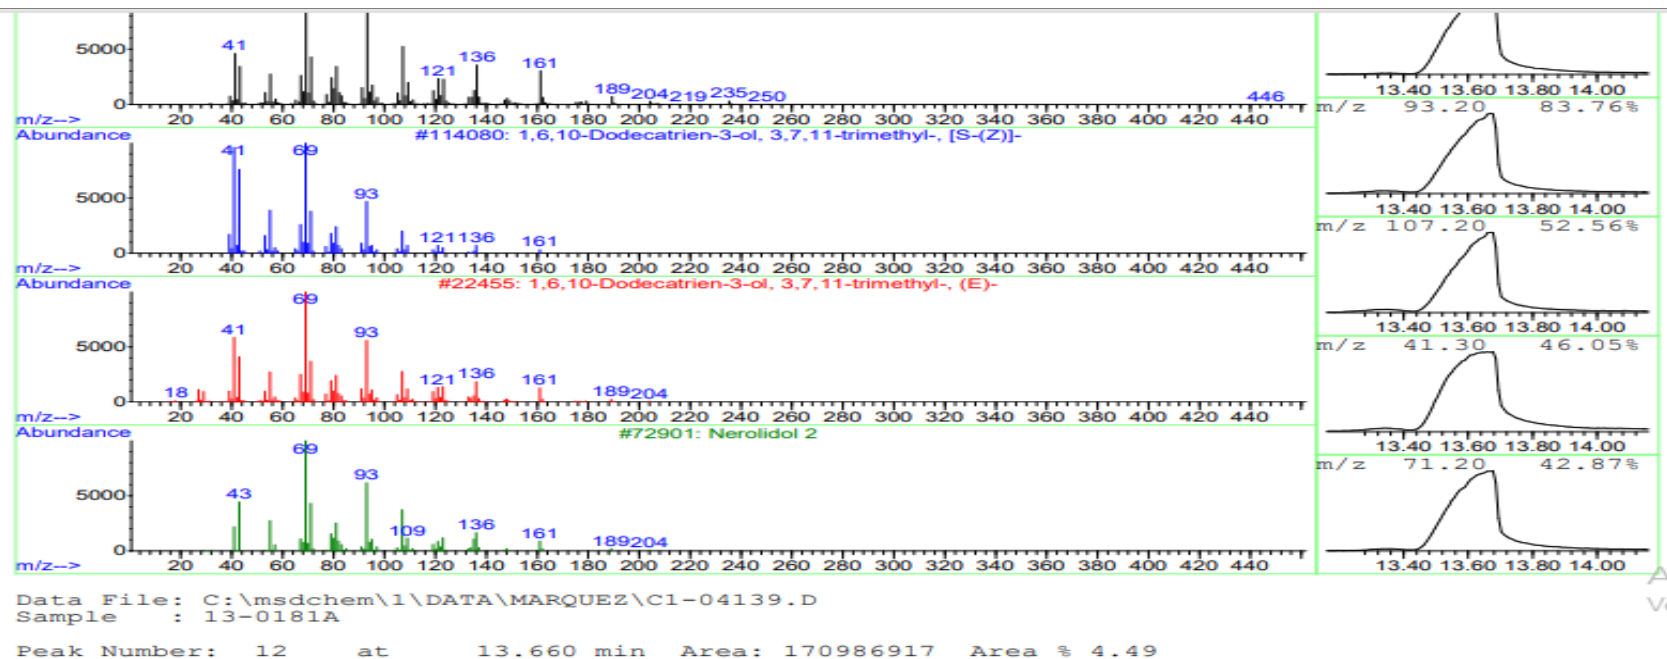

1-Formyl-2,2-dimethyl-3-trans-(3-methyl-but-2-enyl)-6-methylidene-cyclohexane

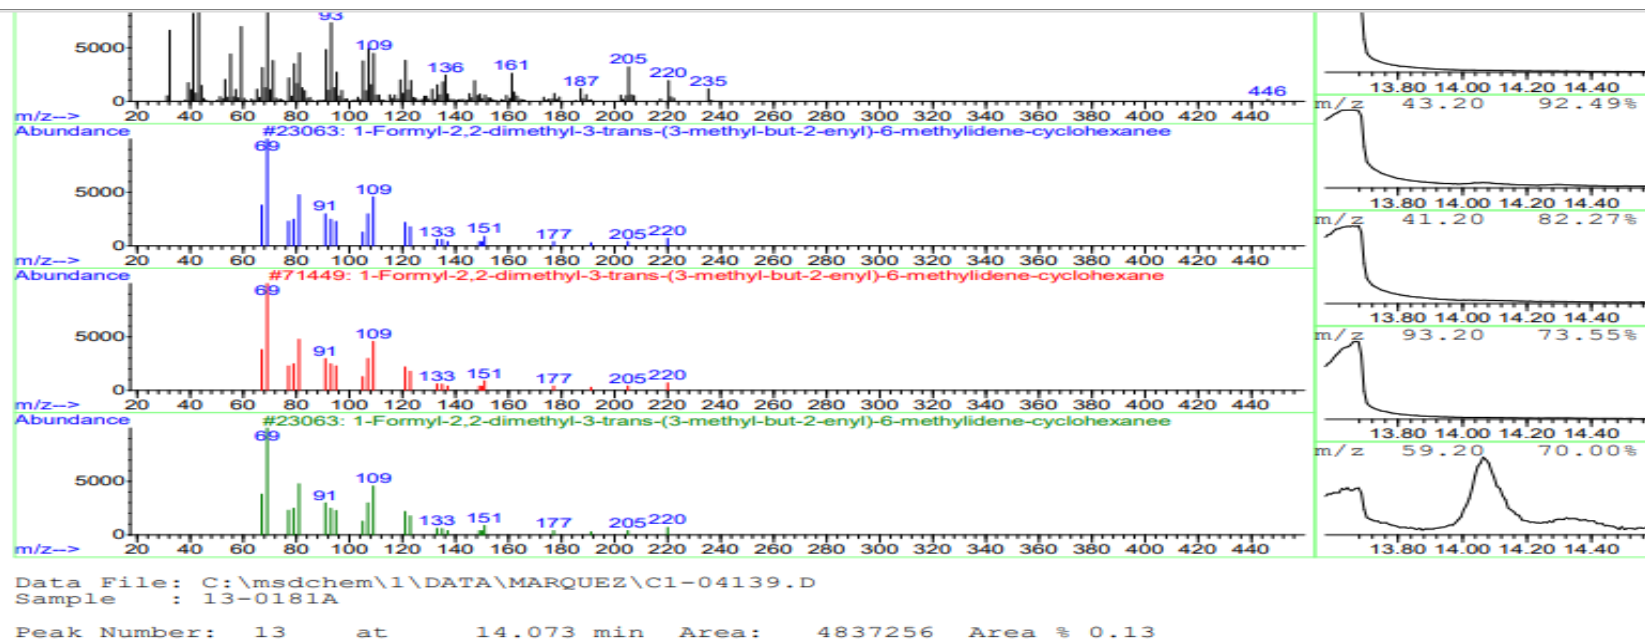

Dihydro-cis- $\alpha$ -copaene-8-ol

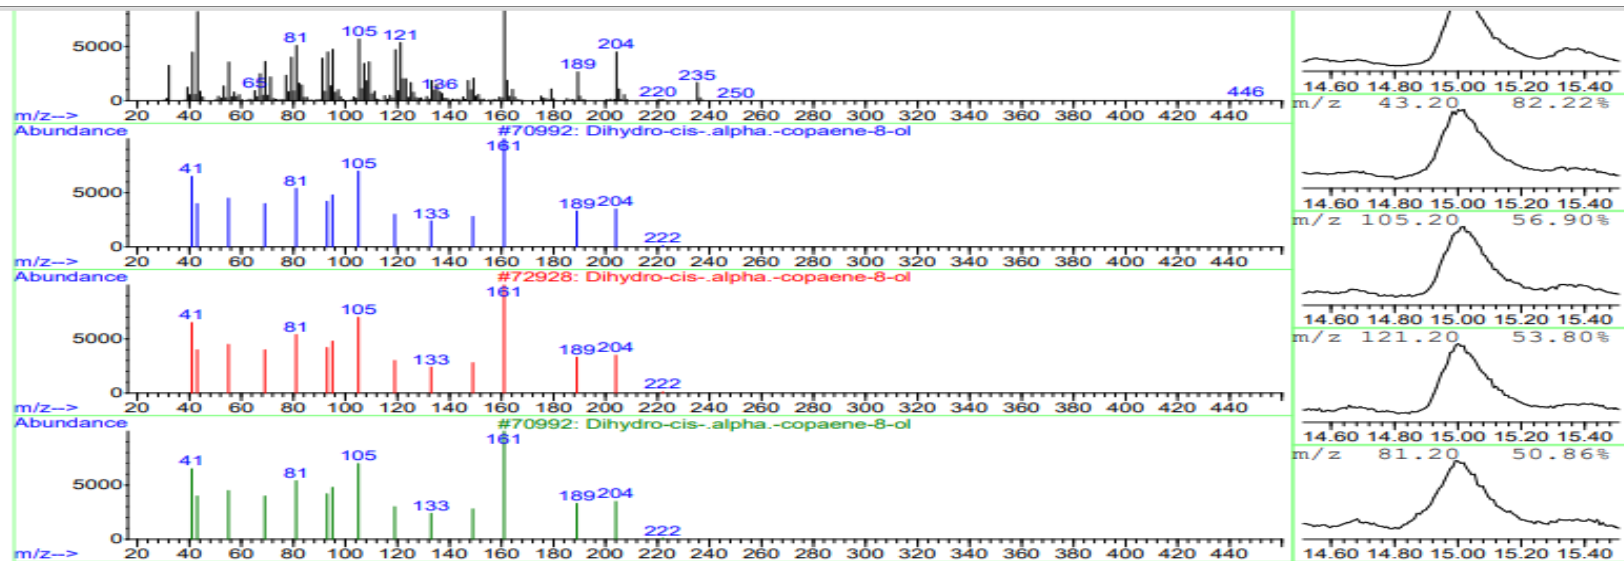

Data File: C:\msdchem\1\DATA\MARQUEZ\C1-04139.D  
Sample : 13-0181A

Peak Number: 15 at 15.010 min Area: 9999104 Area % 0.26

2-Propenoic acid, 3-[4-  
[(3-methyl-1-butenyl)  
oxy]phenyl]-, methyl  
ester

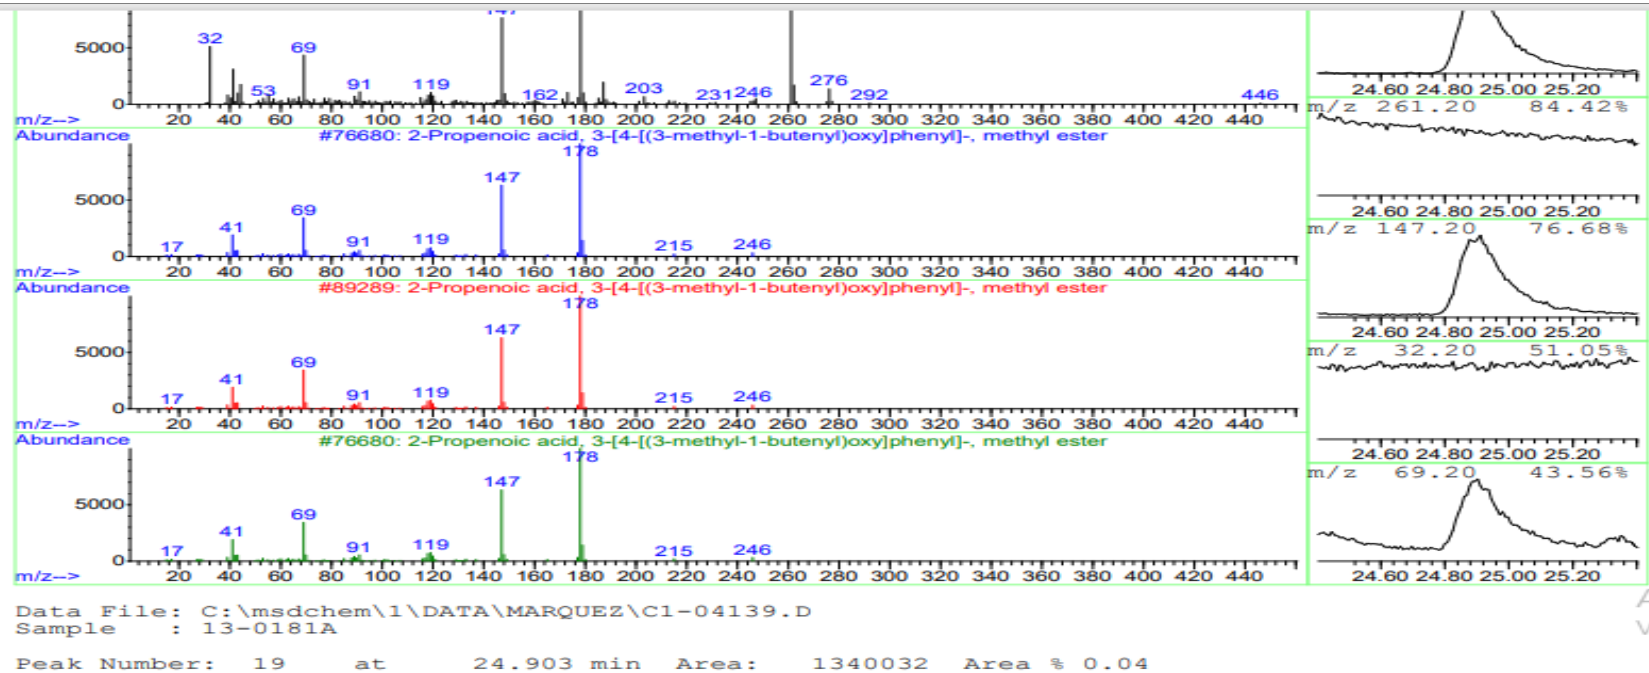

# Squalene

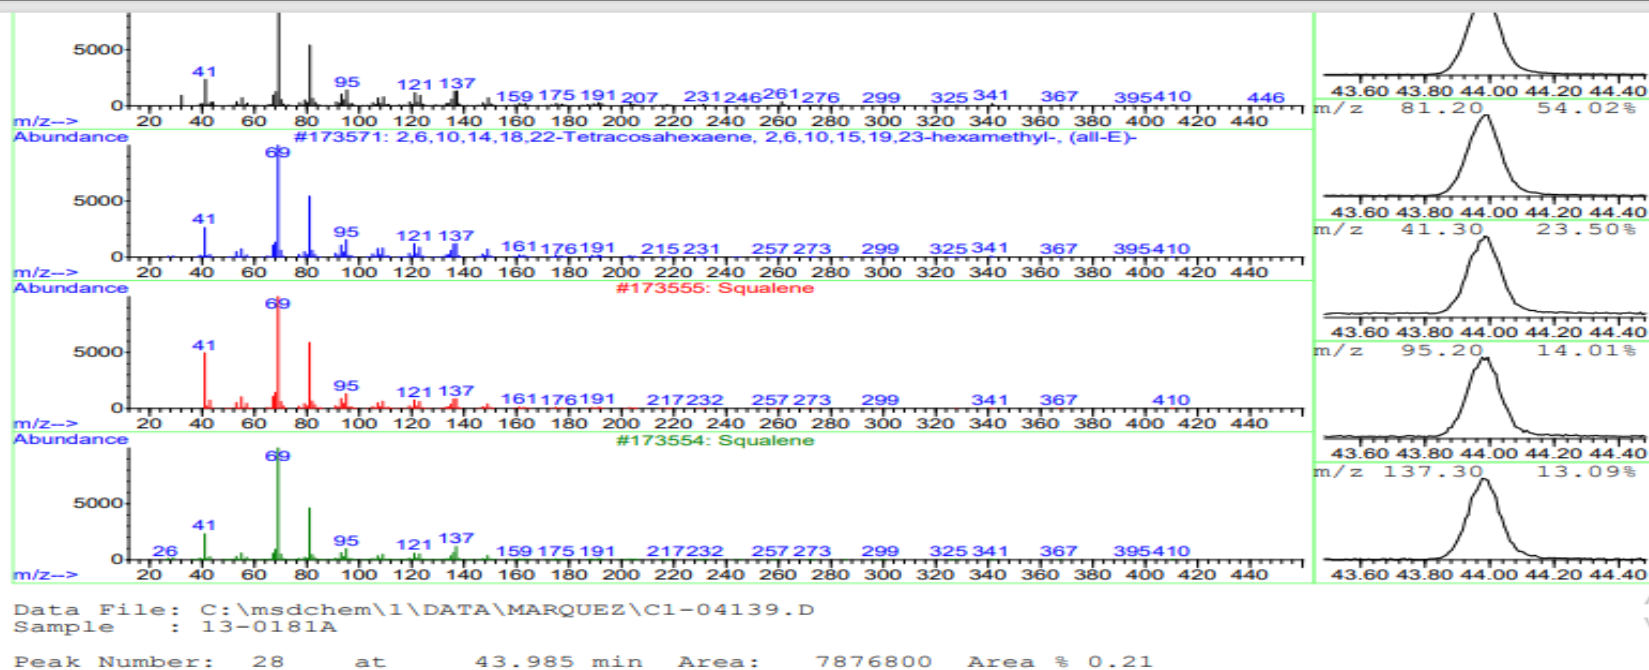



3,7-Dimethyl-oct-6-  
enoic acid, ethyl ester

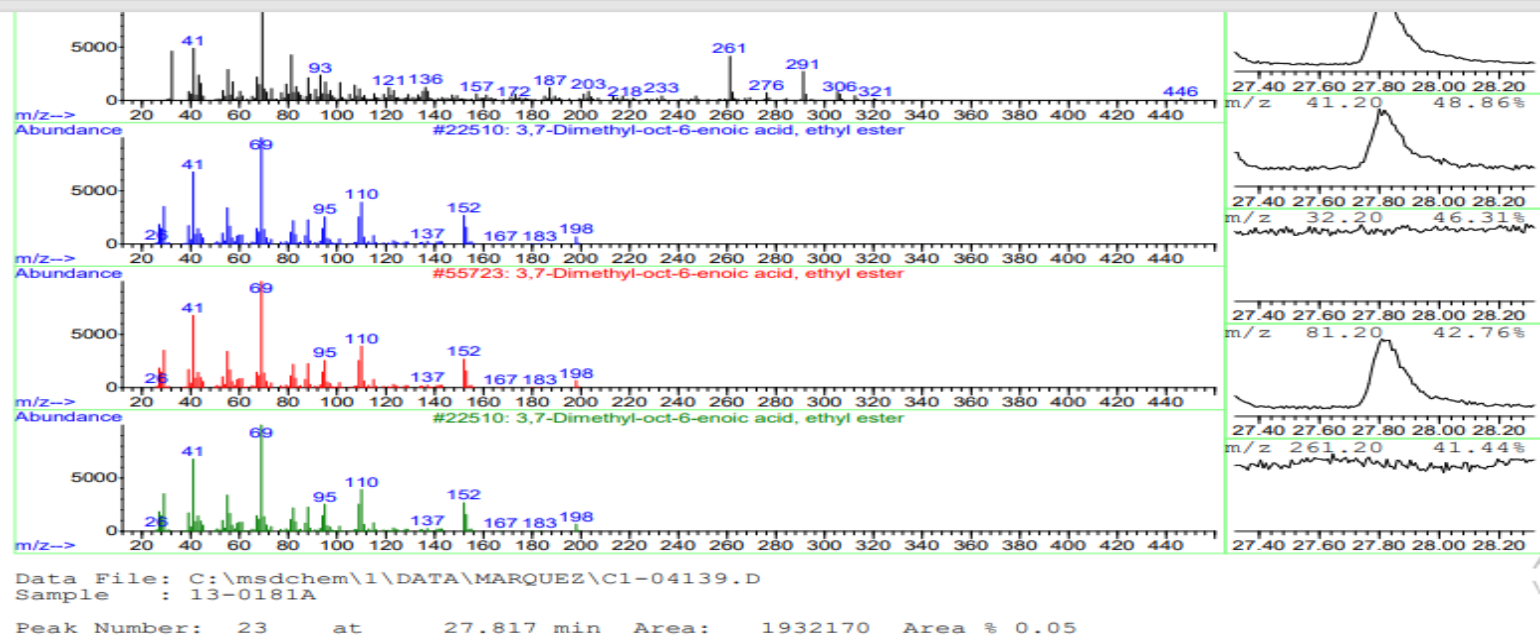

19-Hydroxy-13-  
epimanoyl oxide

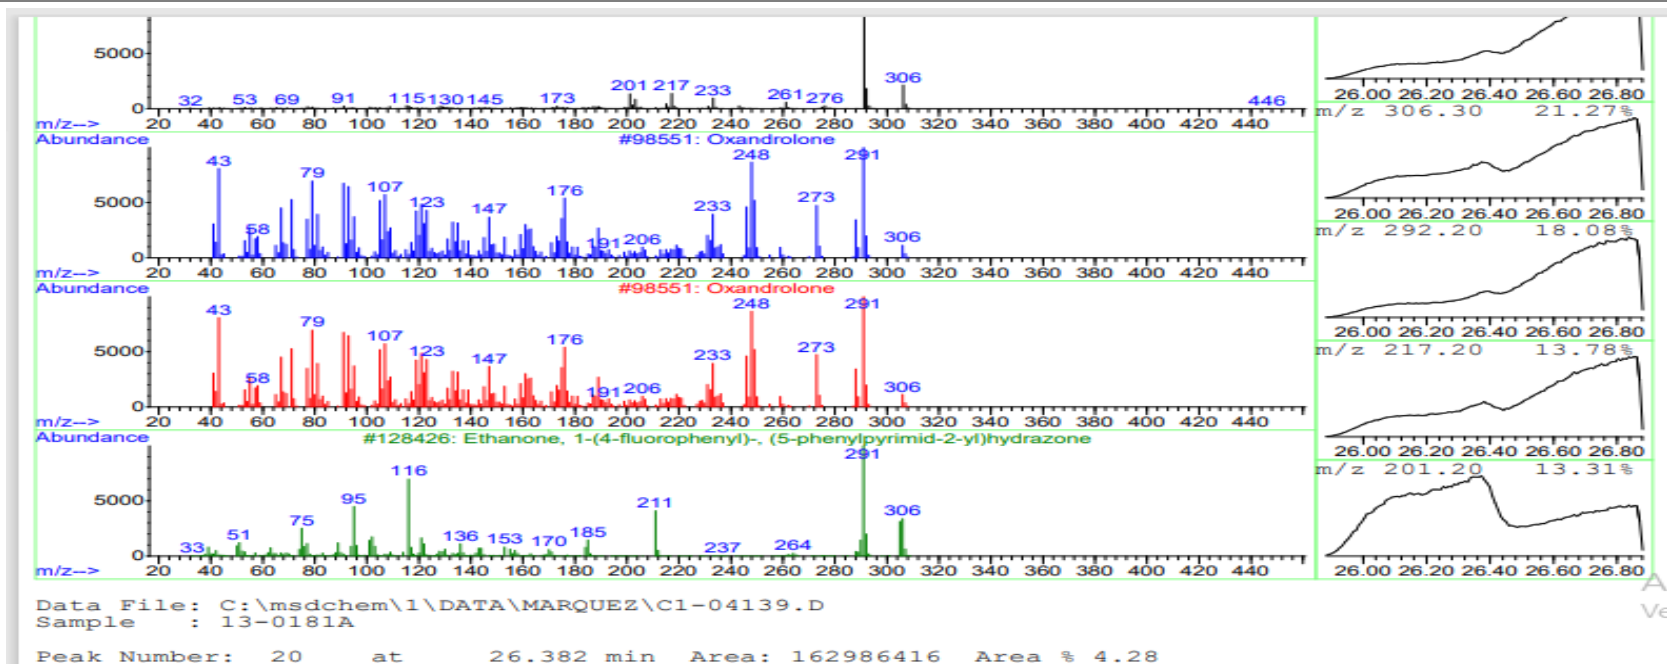

2-Chromancarboxylic  
acid, 6-amino-4-oxo-,  
ethyl ester

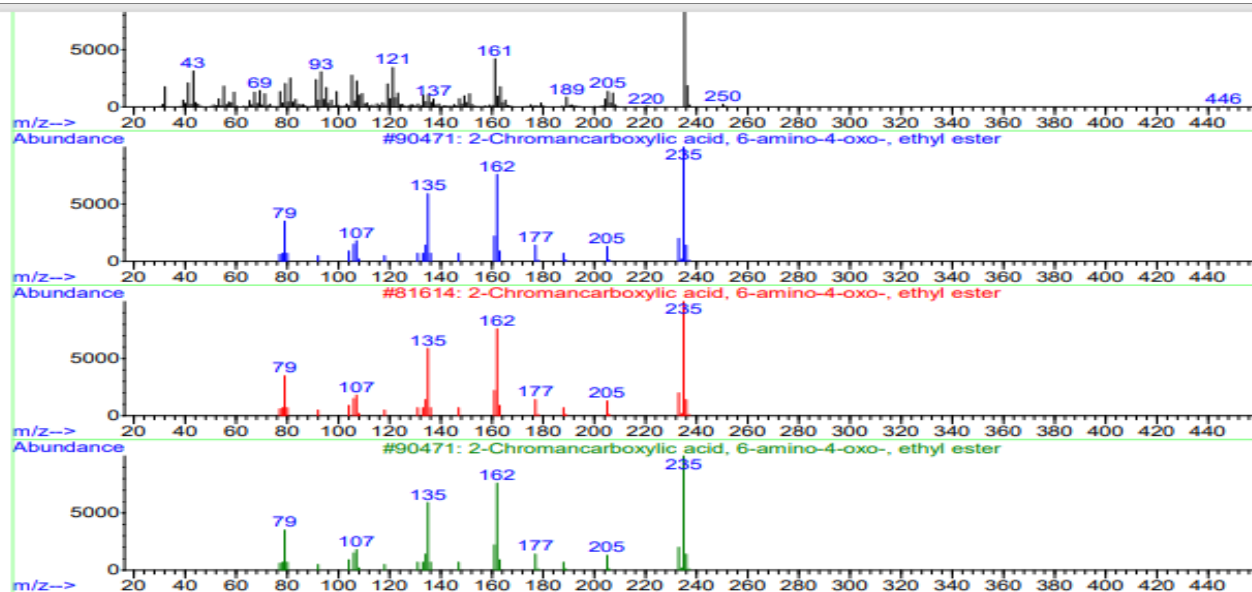

Data File: C:\msdchem\1\DATA\MARQUEZ\C1-04139.D  
Sample : 13-0181A

Peak Number: 11 at 13.351 min Area: 9745117 Area % 0.26

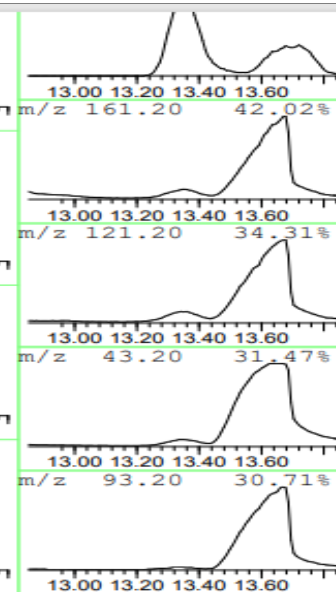

A  
V<sub>c</sub>

Ethyl 5-oxo-4-(p-toluidino)-2,5-dihydro-3-furancarboxylate

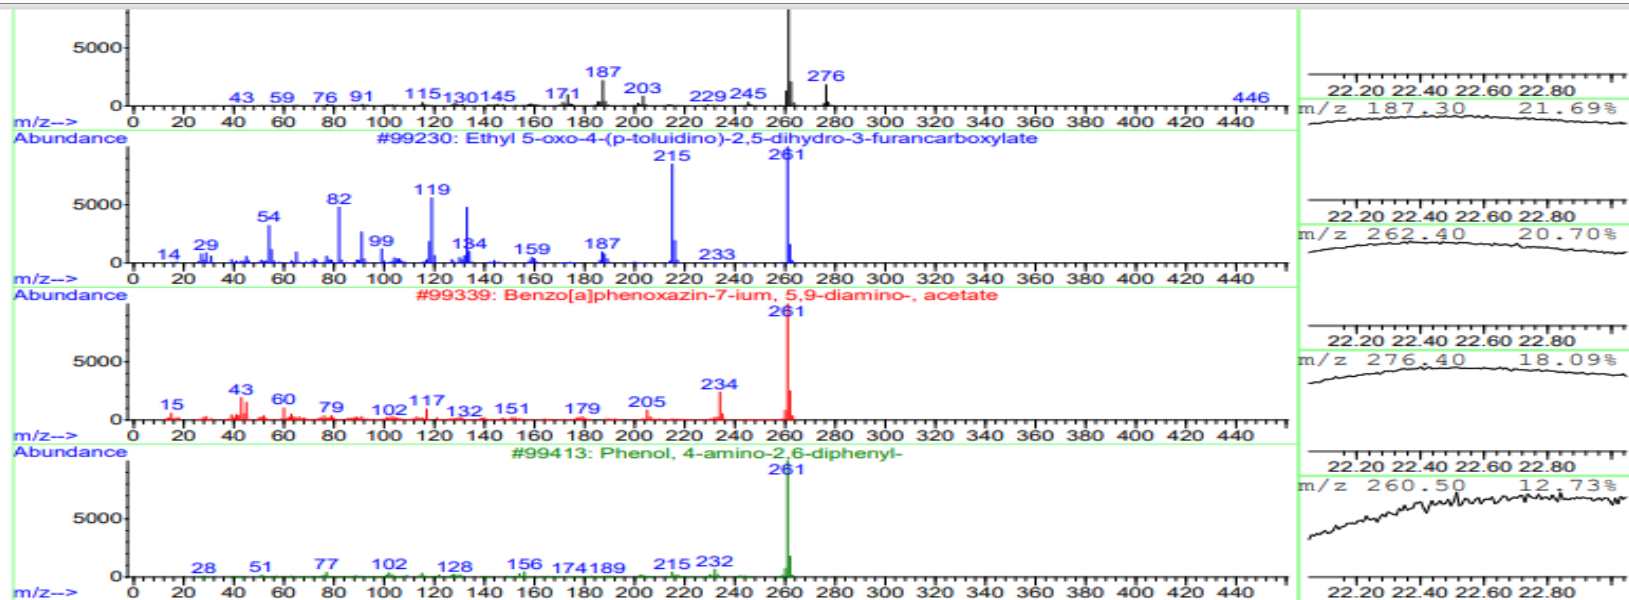

Data File: C:\msdchem\1\DATA\MARQUEZ\C1-04139.D  
Sample : 13-0181A

Peak Number: 16 at 22.548 min Area: 2807481355 Area % 73.70

A  
Ve

Pyrido[2,3-b]pyrimido[4,5-d]thiophen-4(3H)-one,  
3-amino-9-methoxymethyl-2,7-dimethyl

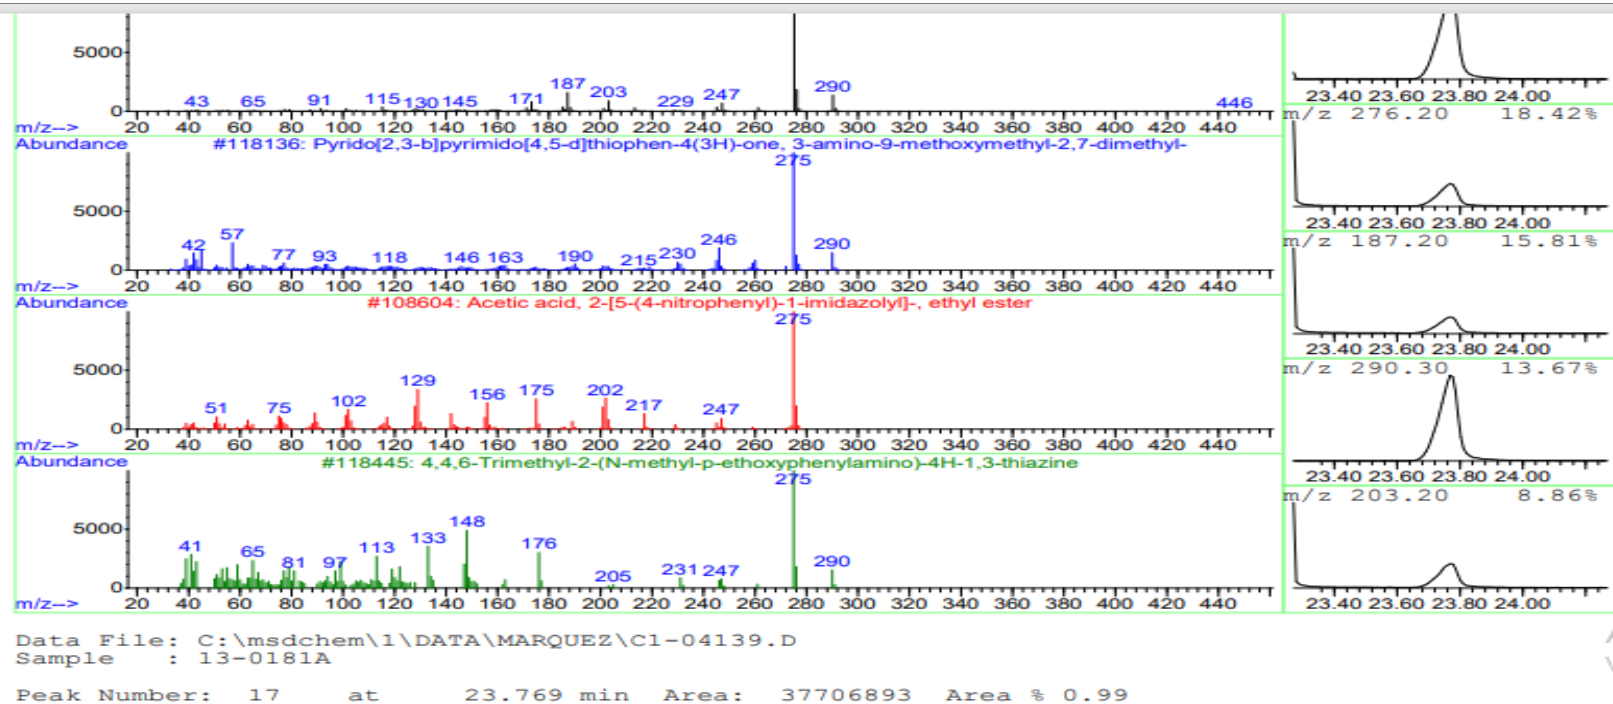

5,6,7-Trimethoxy-2,3-dihydrofuro(2,3-b)quinoline

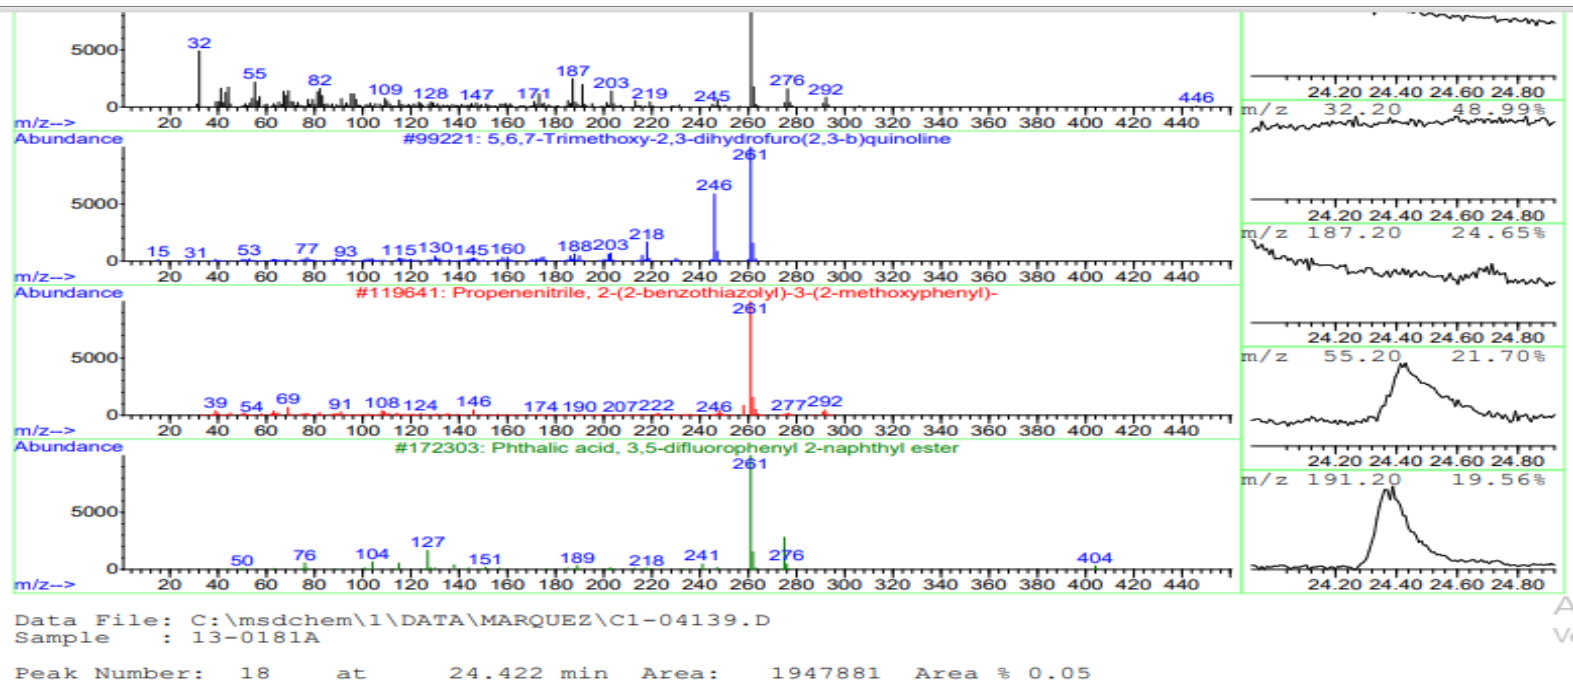

# Atherospermidine

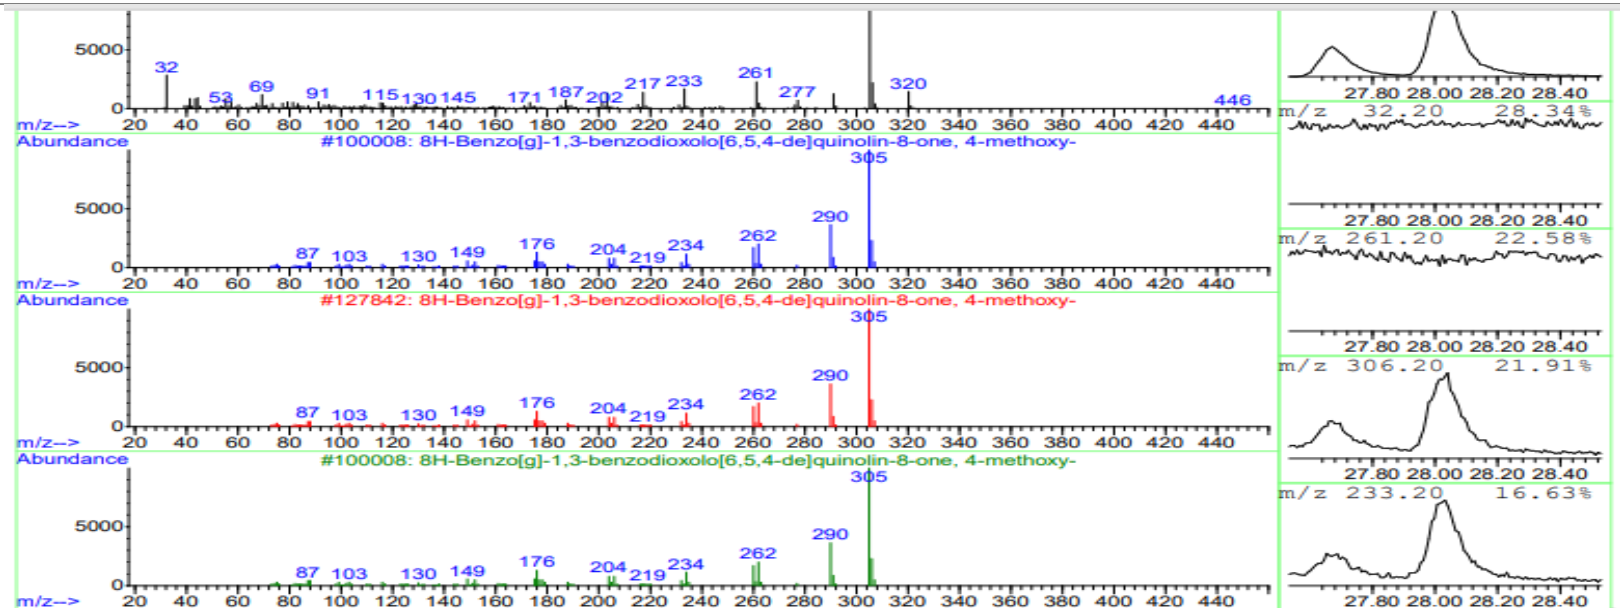

Data File: C:\msdchem\1\DATA\MARQUEZ\C1-04139.D  
Sample : 13-0181A

Peak Number: 24 at 28.032 min Area: 1887311 Area % 0.05

4,5,6,7-Tetrahydro-  
benzo[c]thiophene-1-  
carboxylic acid  
allylamide

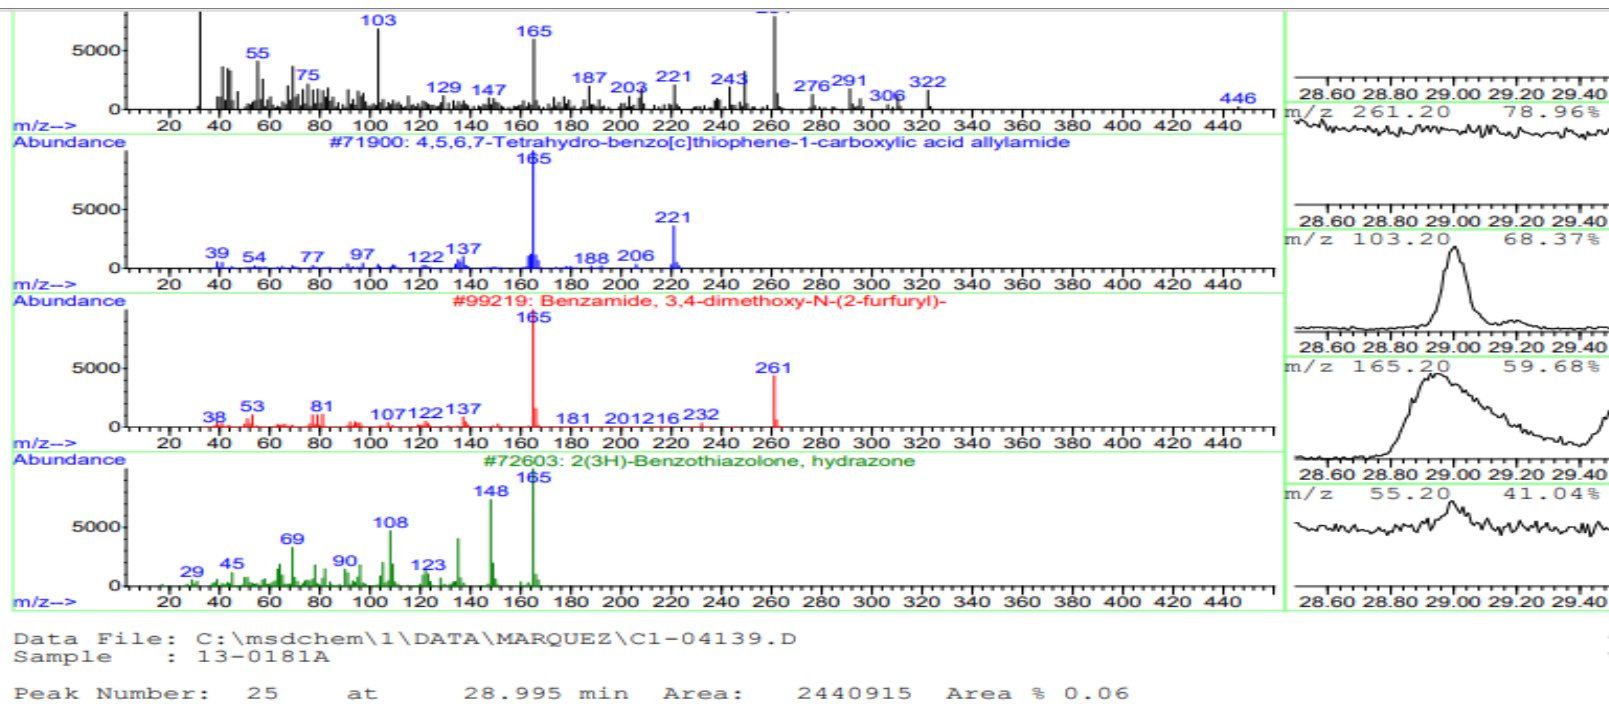



# 9-Phenylcarbazole

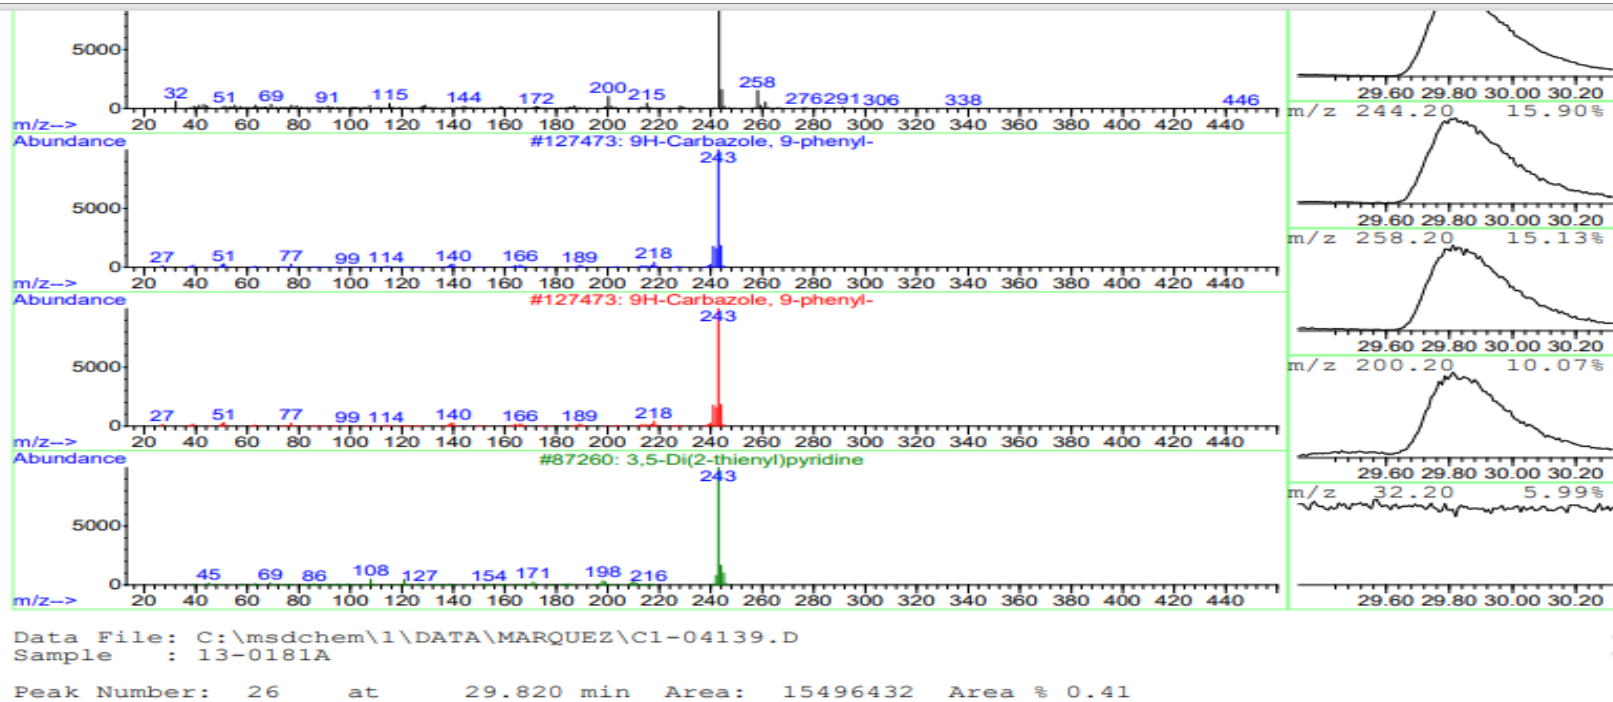

1-(1-Benzothien-2-yl)-  
N,N-  
diethylcyclohexanamine

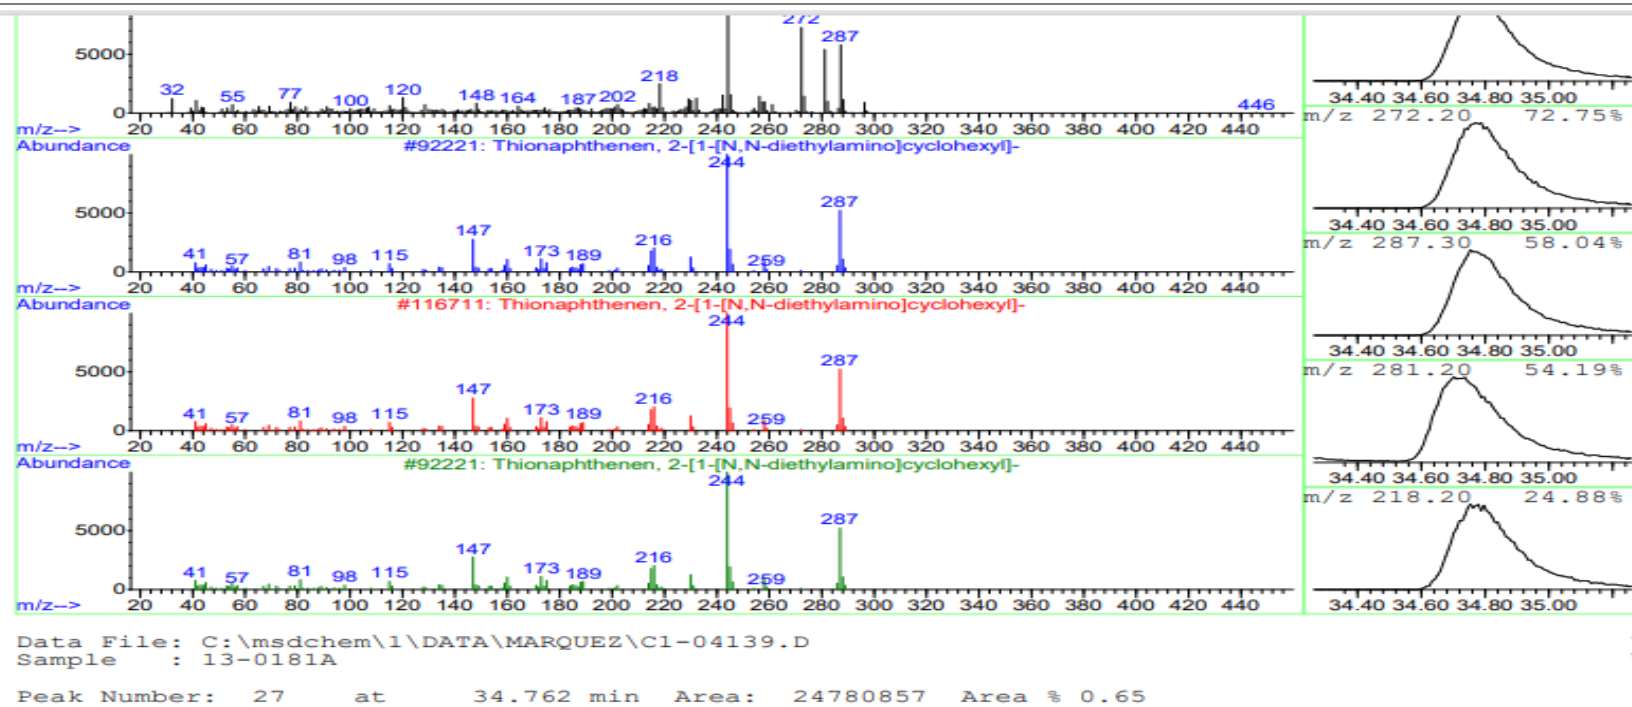

Methyl-methoxy-(1,1-difluoro-2,2-bis-trifluoromethyl-ethyl)amine

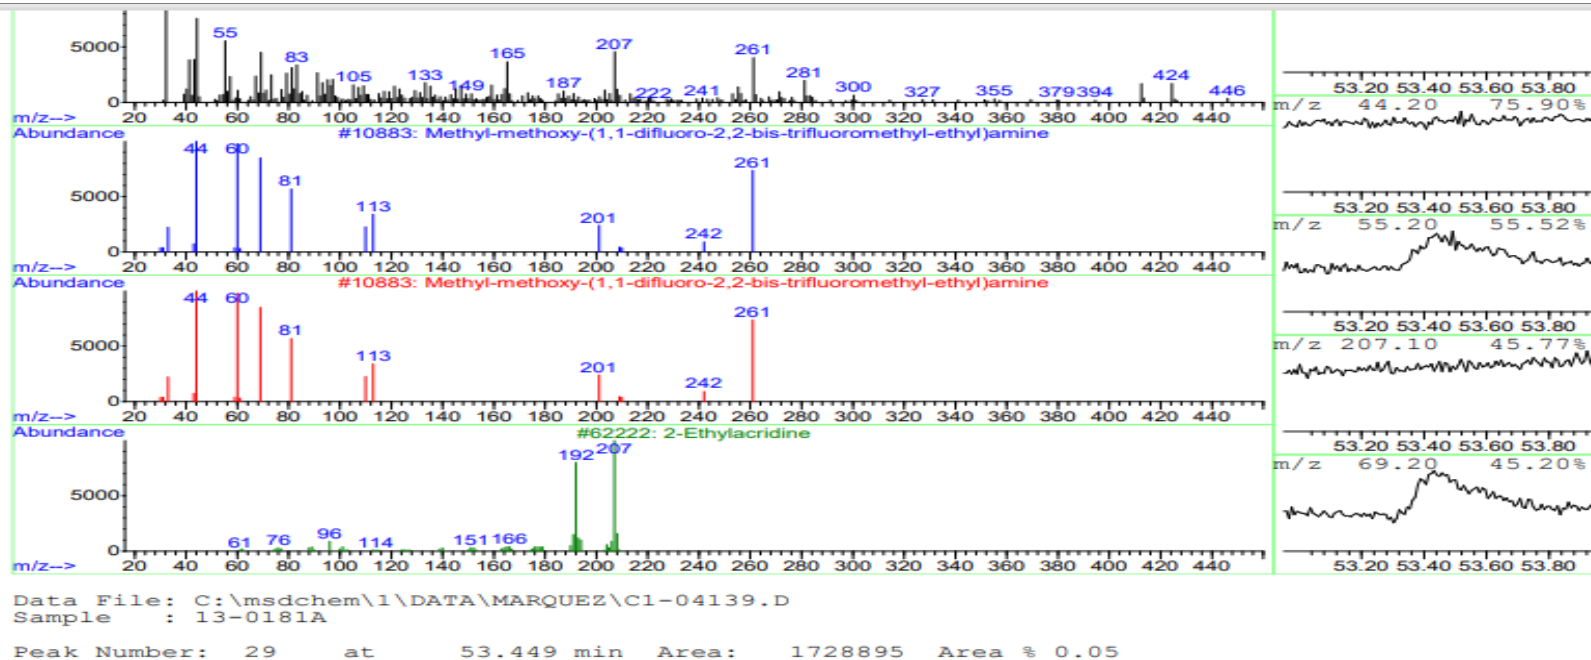

Phenol, 4,4',4''-  
ethylidynetris

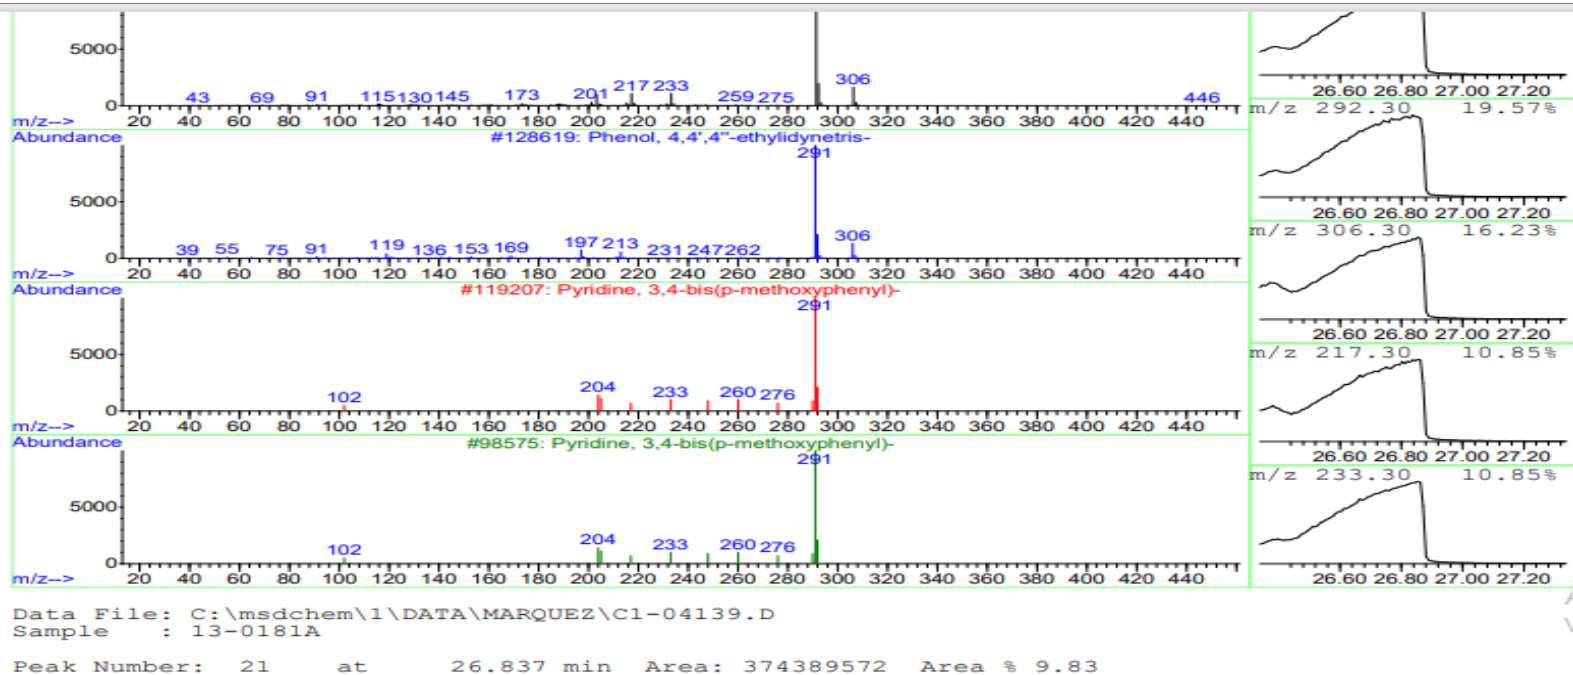

## Ethyl Oleate

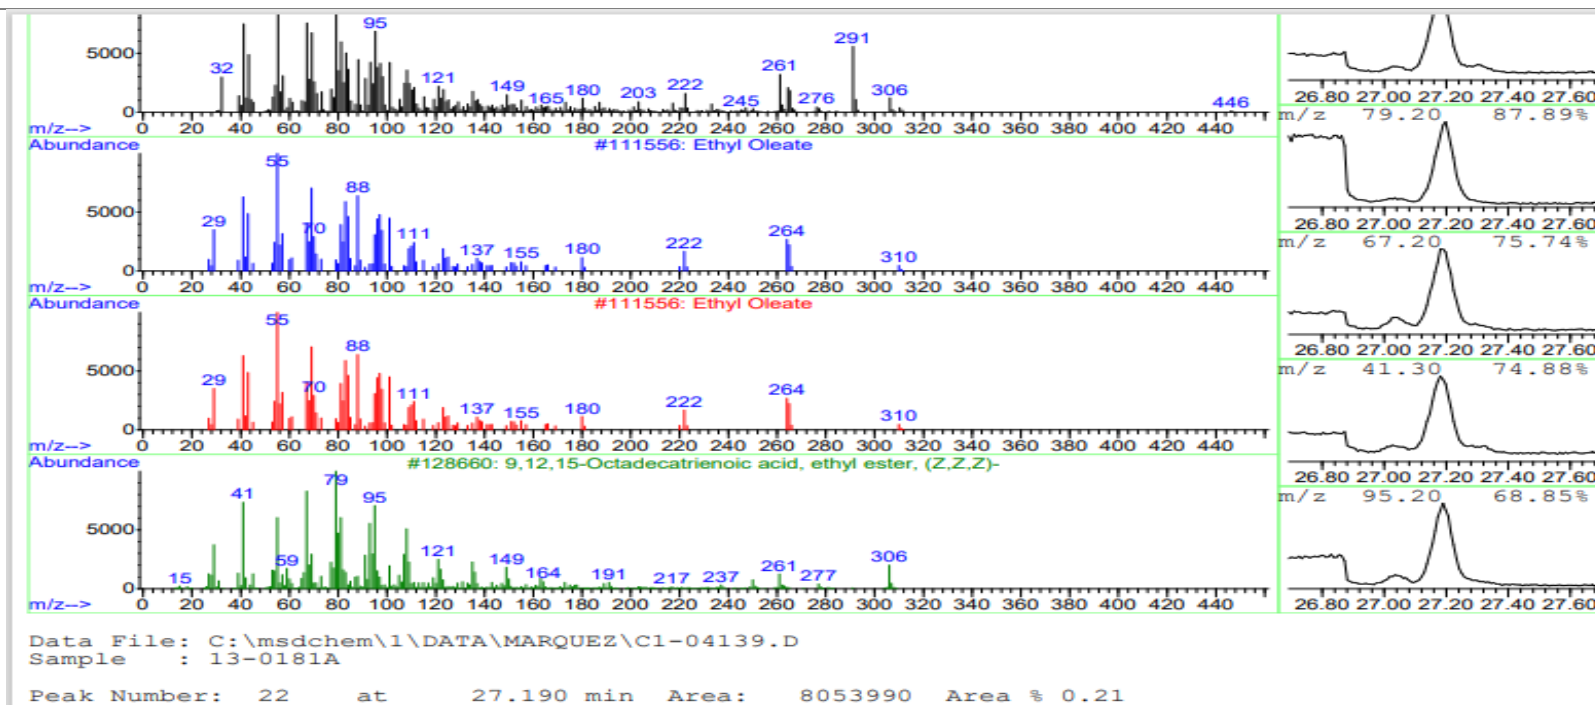

Figure S1. Fragmentation patterns of the mass spectra of the secondary metabolites present in the ethanolic extract of *M. Americana* bark
